# Supplementary material for: Cytoplasmic FUS triggers early behavioral alterations linked to cortical neuronal hyperactivity and inhibitory synaptic defects
Source: PubMed Central journal article supplement (PMC8140148; doi:10.1038/s41467-021-23187-9), 2021-05-21
Supplement: 41467_2021_23187_MOESM1_ESM.pdf [file 41467_2021_23187_MOESM1_ESM.pdf]

**Cytoplasmic FUS triggers early behavioral alterations linked to cortical neuronal hyperactivity and inhibitory synaptic defects**

**Supplementary figures**

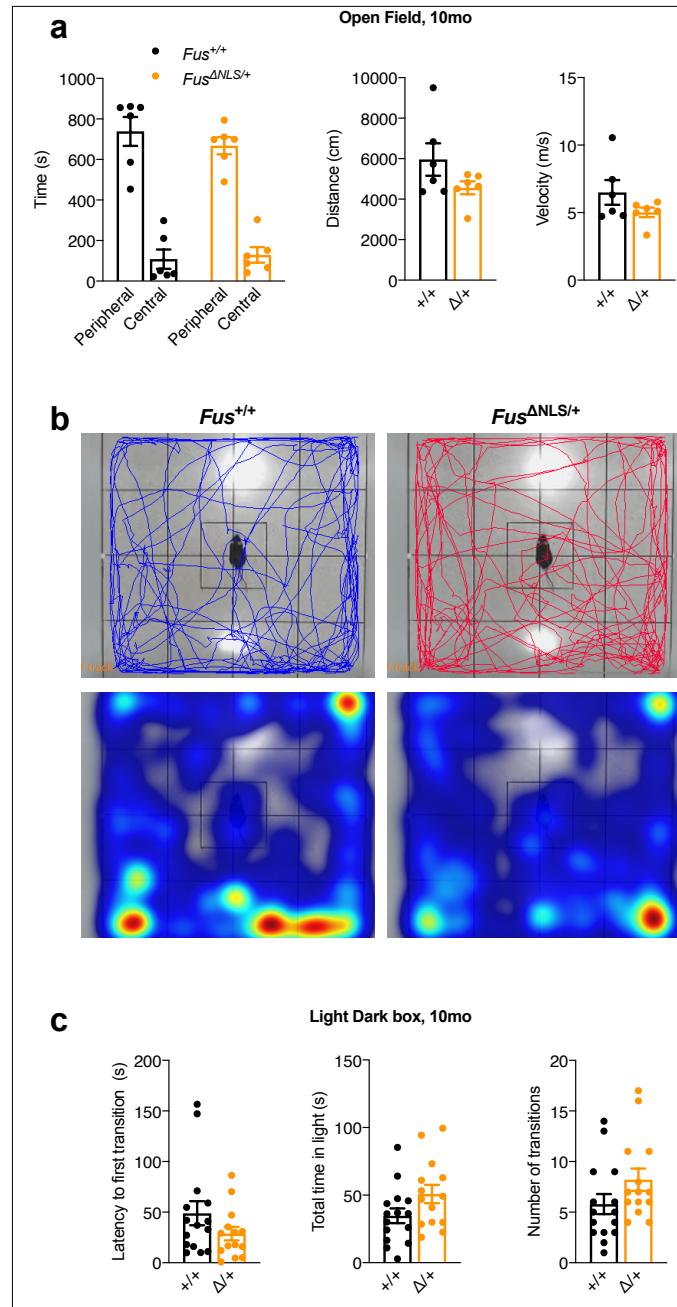

**Supplementary figure 1: Supplementary behavioral characterization of  $Fus^{ANLS/+}$  mice**

(a) Bar charts showing time spent in peripheral and central quadrants of the open field arena of 10 months old  $Fus^{+/+}$  (black) and  $Fus^{ANLS/+}$  (orange) male mice. Total distance traveled (in centimeters) (**middle graph**) and average speed of movements (in meters per second) (**left graph**) are presented. Data are presented as mean  $\pm$  SEM. For panel a, N = 6  $Fus^{+/+}$  mice

and N=6 *Fus*<sup>ΔNLS/+</sup> mice were analyzed. Multiple Two-sided Unpaired Student's t-tests. p = 0.84 (peripheral quadrants) and p = 0.34 (central quadrants). Unpaired t-test. p=0.13 (distance) and p = 0.16 (velocity).

(b) Representative images of tracking's trajectories (upper panels) and heat maps of mouse movement (lower panels) and in the open field of 10 months old *Fus*<sup>+/+</sup> and *Fus*<sup>ΔNLS/+</sup> animals.

(c) Bar charts showing latency time to enter the illuminated compartment (**left graph**), total time spent in the illuminated compartment (**middle graph**), and number of transitions between dark and the illuminated compartments (**right graph**) in the dark-light box test for 10 months old *Fus*<sup>+/+</sup> (black) and *Fus*<sup>ΔNLS/+</sup> (orange) mice. All values are represented as mean +/- SEM. For panel c, N=15 *Fus*<sup>+/+</sup> mice and N=14 *Fus*<sup>ΔNLS/+</sup> mice were analyzed. Two-sided unpaired Student's t-test, p = 0.15 (latency) and p = 0.07 (total time) and p = 0.11 (transitions).

Source data are provided as a Source Data file.

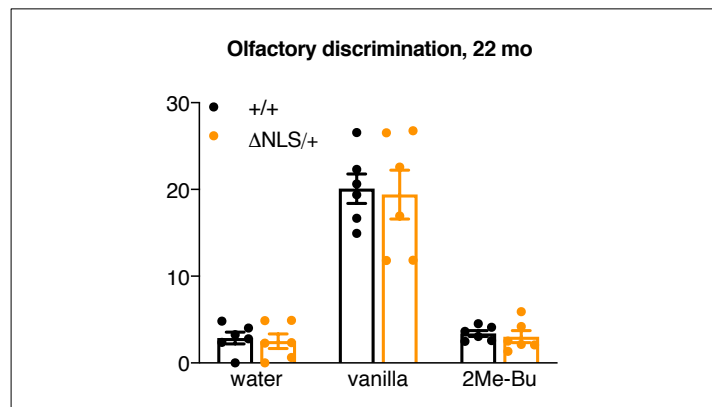

### Supplementary figure 2: Preserved olfactory function in *Fus*<sup>ΔNLS/+</sup> mice

Analysis of olfactory function in *Fus*<sup>+/+</sup> and *Fus*<sup>ΔNLS/+</sup> male mice at 22 months of age. Bar graphs showing similar preference of both genotypes for “attractive” scents (vanilla) compared to water and “aversive” stimuli. N=6 *Fus*<sup>+/+</sup> mice and N=6 *Fus*<sup>ΔNLS/+</sup> mice were analyzed. All values are presented as mean +/- SEM of time mice spent sniffing filter paper immersed in corresponding solution. Multiple two-sided unpaired Student's t-tests, p = 0.74 (water), p = 0.84 (vanilla) and p = 0.64 (2-methyl butyrate).

Source data are provided as a Source Data file.

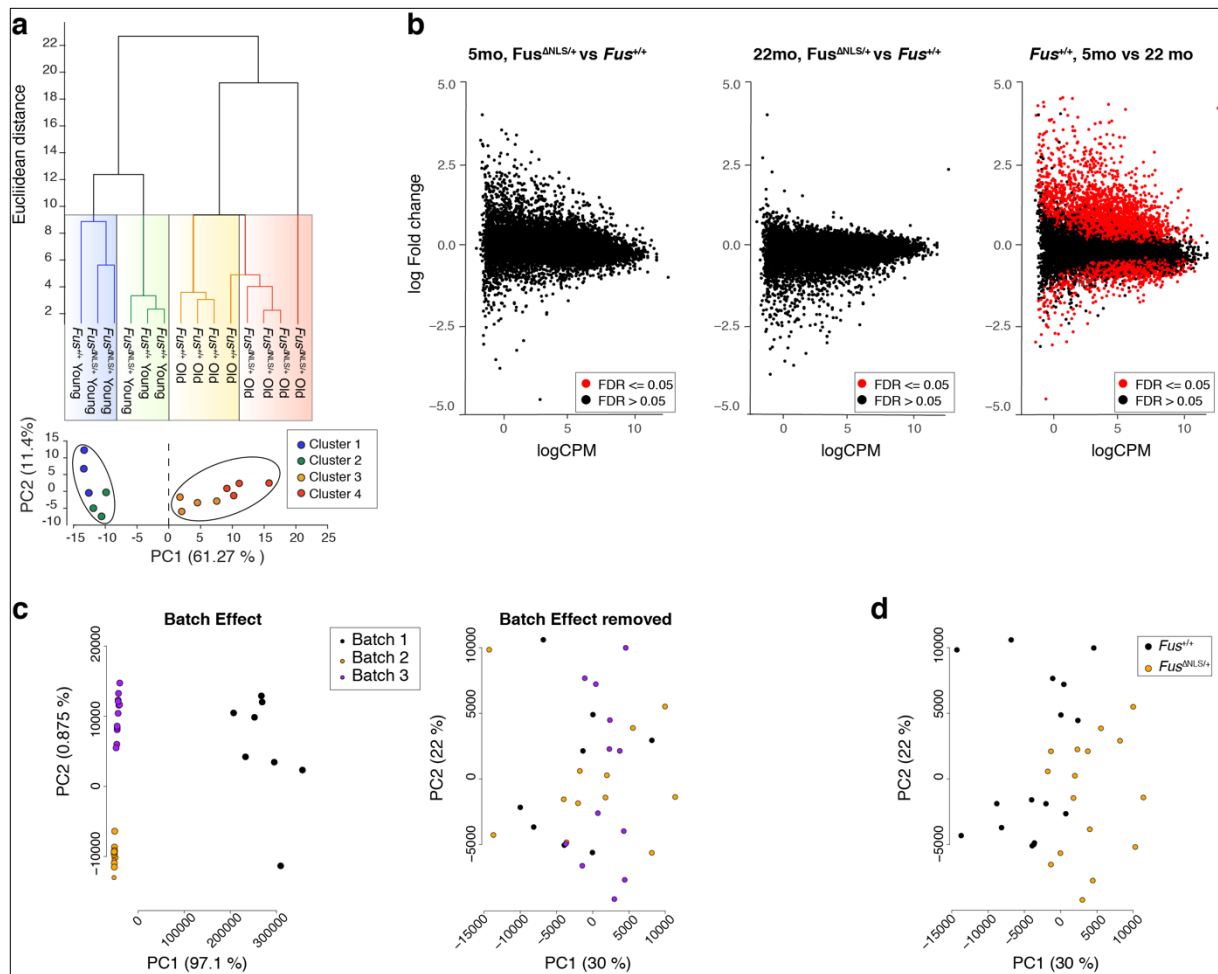

### Supplementary Figure 3: Additional results of RNAseq analysis, related to Figure 5

**(a)** Hierarchical clustering and principal components analysis (PCA) shows that the first PCA differentiates between 5 months and 22 months old mice, while PC2 distinguishes between  $Fus^{+/+}$  and  $Fus^{ANLS/+}$  mice only in young animals.

**(b)** The MA plot shows no DE genes at 5 and 22 months. However, we detect 2297 DE genes between 22 months and 5 months WT mice (FDR  $< 0.05$ ).

**(c-d)** Negative binomial regression removes significant batch effect. After batch correction, we observe clustering of samples according to genotype on the PCA plot **(d)**.

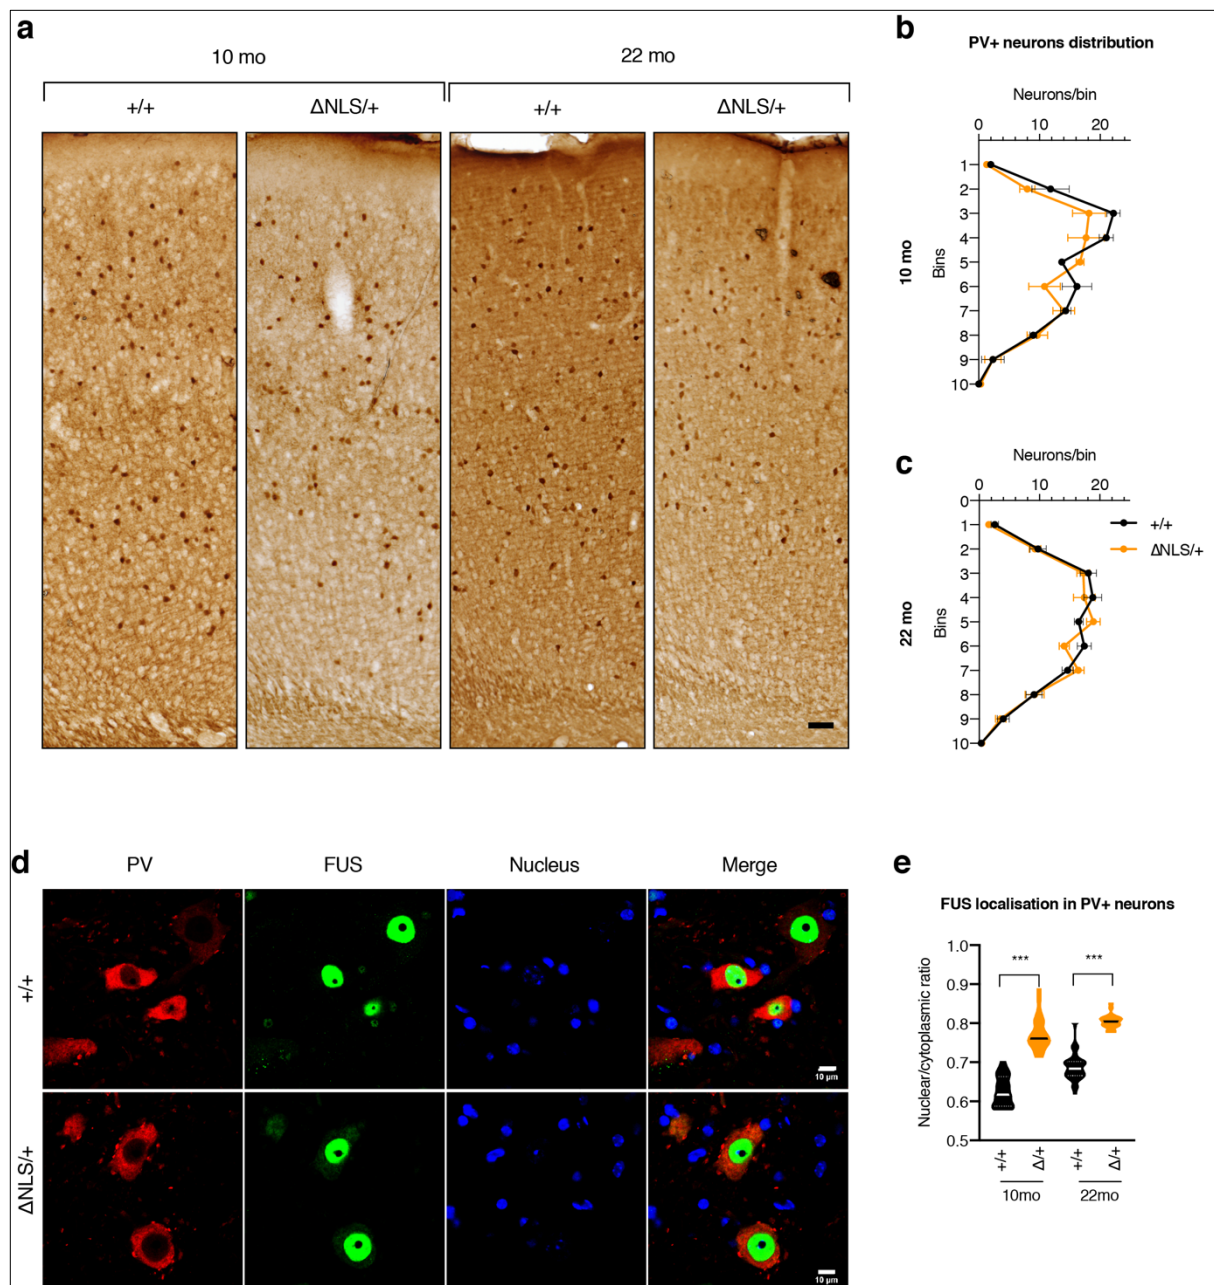

#### Supplementary Figure 4: Characterization of PV interneurons in *Fus*<sup>ΔNLS/+</sup> mice

(a) Representative image of Parvalbumin immunohistochemistry of frontal cortex tissues at 10 and 22 months of age in *Fus*<sup>+/+</sup> (+/+) or *Fus*<sup>ΔNLS/+</sup> (Δ/+) male mice. N = 3 *Fus*<sup>+/+</sup> mice and N = 3 *Fus*<sup>ΔNLS/+</sup> mice were analyzed at 10 months of age, and N = 6 *Fus*<sup>+/+</sup> mice and N = 6 *Fus*<sup>ΔNLS/+</sup> mice were analyzed at 22 months. Scale bar: 100μm (b, c) Distribution of parvalbumin+ neurons (PV+) in frontal cortex of *Fus*<sup>+/+</sup> (black) vs *Fus*<sup>ΔNLS/+</sup> (orange) at 10 (b) or 22 (c) months of age. Data are presented as mean +/- SEM. A two-way repeated measure analysis of variance (ANOVA) (genotype \* bins) was conducted to determine the effect of genotype on PV interneuron distribution. b: p=0.3618; c: p=0.8254.

(d) Immunofluorescence of parvalbumin (red) and FUS (green) neuronal localization in frontal cortex in *Fus*<sup>+/+</sup> (+/+) or *Fus*<sup>ΔNLS/+</sup> (Δ/+) mice at 22 months of age. N = 6 *Fus*<sup>+/+</sup> mice and N = 6 *Fus*<sup>ΔNLS/+</sup> mice were analyzed at 10 months of age, and N = 3 *Fus*<sup>+/+</sup> mice and N = 9 *Fus*<sup>ΔNLS/+</sup> mice were analyzed at 22 months. Scale bar: 10μm (e) Violin plot displaying the distribution of the ratio between nuclear and cytoplasmic in individual PV+ neurons in the frontal cortex of

*Fus*<sup>+/+</sup> (black) or *Fus*<sup>ΔNLS/+</sup> ( $\Delta$ +) mice (orange) at 10 and 22 months. N = 96 cells from 6 *Fus*<sup>+/+</sup> mice and N = 61 cells from 6 *Fus*<sup>ΔNLS/+</sup> mice were analyzed at 10 months. N = 68 cells from 3 *Fus*<sup>+/+</sup> mice and N = 139 cells from 9 *Fus*<sup>ΔNLS/+</sup> mice were analyzed at 22 months. Kruskal-Wallis test, followed by Dunn's for multiple comparisons. \*\*\*, P < 0.0001  
Source data are provided as a Source Data file.

| Age (months)        | 1 | 4-6 | 10-12 | 22 |
|---------------------|---|-----|-------|----|
| Behavior            |   | ✓   | ✓     | ✓  |
| In vivo imaging     |   | ✓   | ✓     |    |
| RNA-seq             | ✓ | ✓   |       | ✓  |
| Synaptosomes        |   | ✓   |       |    |
| MRI                 |   |     | ✓     |    |
| Histology           |   |     |       | ✓  |
| Electron microscopy |   |     |       | ✓  |

**Supplementary Figure 5: Summary of experiments on a timeline.**
